# Supplementary material for: Economic and Clinical Burden of Managing Sickle Cell Disease with Recurrent Vaso-Occlusive Crises in the United States
Source: PubMed Central journal article supplement — Adv Ther. 2023 Jun 18;40(8):3543–58. doi: 10.1007/s12325-023-02545-7 (PMC10329958; doi:10.1007/s12325-023-02545-7), 2023-06-18
Supplement: 12325_2023_2545_MOESM1_ESM.pdf [file 12325_2023_2545_MOESM1_ESM.pdf]

# **Economic and Clinical Burden of Managing Sickle Cell Disease with Recurrent Vaso-Occlusive Crises in the United States**

Chuka Udeze<sup>a</sup>, Kristin A. Evans<sup>b</sup>, Yoojung Yang<sup>a</sup>, Timothy Lillehaugen<sup>b</sup>, Janna Manjelievskaia<sup>b</sup>,  
Urvi Mujumdar<sup>a</sup>, Nanxin Li<sup>a</sup>, Biree Andemariam<sup>c,\*</sup>

<sup>a</sup>*Vertex Pharmaceuticals Incorporated, Boston, MA, USA;* <sup>b</sup>*Merative, Cambridge, MA, USA;*

<sup>c</sup>*University of Connecticut Health, Farmington, CT, USA*

*\*Corresponding author*

**Correspondence:** Biree Andemariam, MD, Division of Hematology-Oncology, University of  
Connecticut Health, 263 Farmington Avenue, Farmington, CT, 06030, USA.

Email: [andemariam@uchc.edu](mailto:andemariam@uchc.edu).

○ Subgroup of patients with  $\geq 2$  VOCs/year ● Patients with SCD with recurrent VOCs --- Matched controls

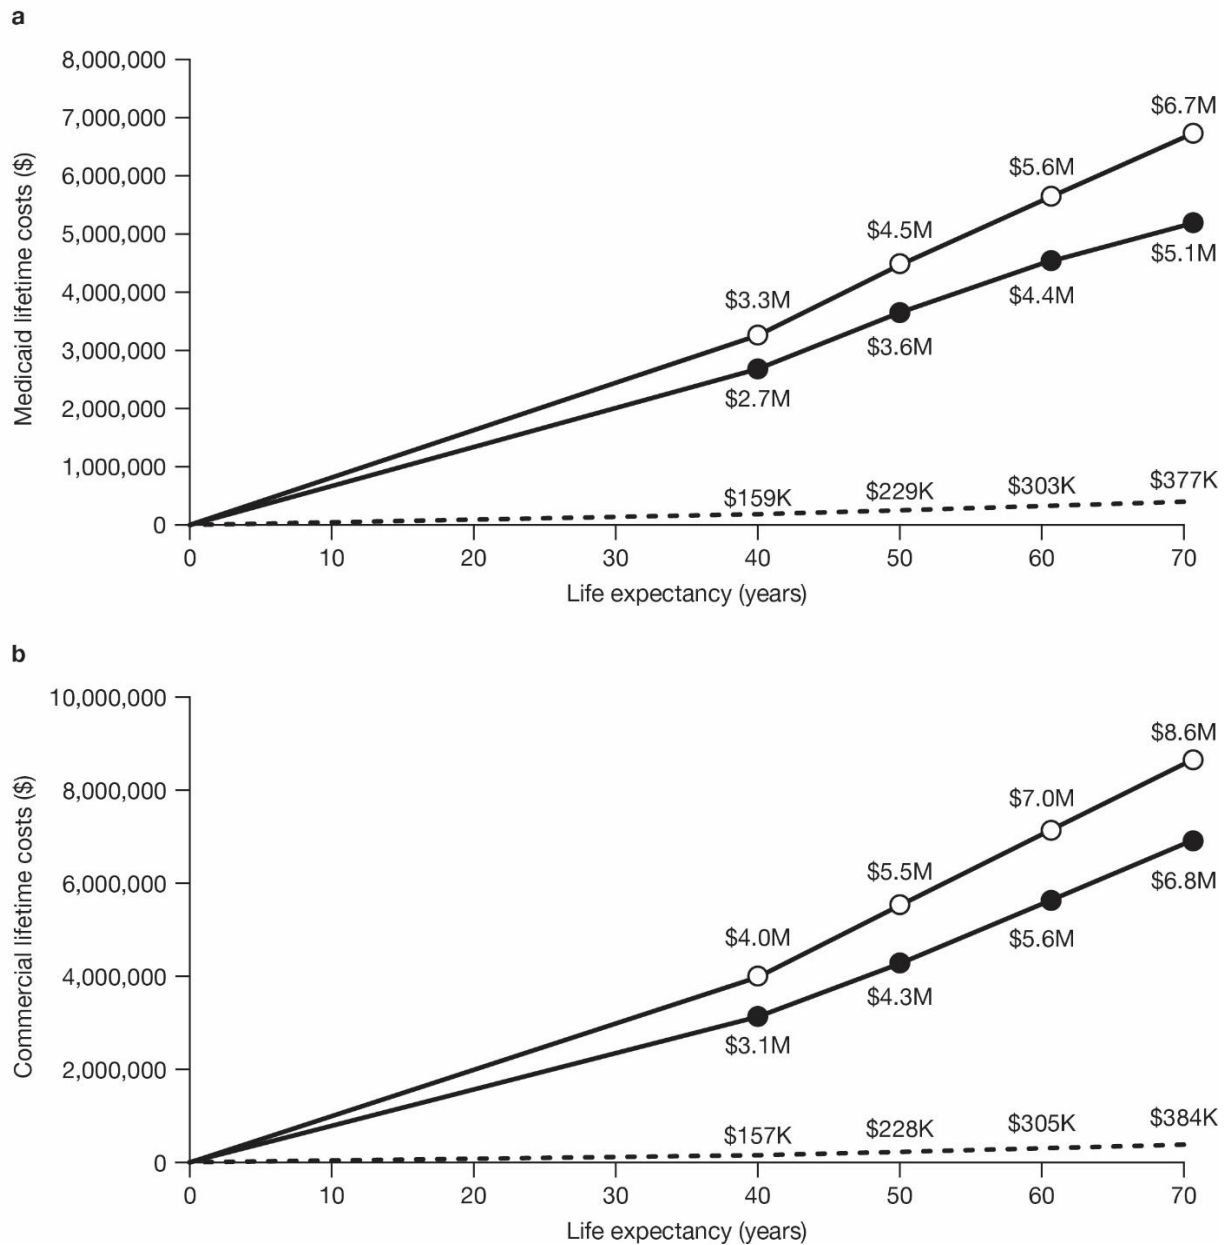

**Supplementary Fig. 1** Lifetime healthcare costs for patients with SCD with recurrent VOCs, the subgroup of patients who continued to experience  $\geq 2$  VOCs per year during the variable-length follow-up, and matched controls based on coverage with **a** Medicaid or **b** commercial insurance.

*K* thousand, *M* million, *SCD* sickle cell disease, *VOC* vaso-occlusive crisis

**SUPPLEMENTARY MATERIAL**

**Supplementary Table 1** Clinical complications in patients with SCD with recurrent VOCs by age and number of VOCs<sup>a</sup>

| Clinical complication, <i>n</i> (%) <sup>b</sup> | Age (years)                   |                                |                          | Number of VOCs                                                |                                                               |
|--------------------------------------------------|-------------------------------|--------------------------------|--------------------------|---------------------------------------------------------------|---------------------------------------------------------------|
|                                                  | 0 to 11<br>( <i>n</i> = 1065) | 12 to 35<br>( <i>n</i> = 1963) | ≥36<br>( <i>n</i> = 392) | <2 VOCs per<br>year during<br>follow-up<br>( <i>n</i> = 1110) | ≥2 VOCs per<br>year during<br>follow-up<br>( <i>n</i> = 2310) |
| Acute infections                                 | 896 (84.1)                    | 1512 (77.0)                    | 288 (73.5)               | 767 (69.1)                                                    | 1929 (83.5)                                                   |
| Chronic lung disease                             | 646 (60.7)                    | 866 (44.1)                     | 141 (36.0)               | 503 (45.3)                                                    | 1150 (49.8)                                                   |
| Asthma                                           | 636 (59.7)                    | 810 (41.3)                     | 107 (27.3)               | 482 (43.4)                                                    | 1071 (46.4)                                                   |
| Mental health complications                      | 229 (21.5)                    | 901 (45.9)                     | 177 (45.2)               | 237 (21.4)                                                    | 1070 (46.3)                                                   |
| Anxiety                                          | 167 (15.7)                    | 592 (30.2)                     | 113 (28.8)               | 145 (13.1)                                                    | 727 (31.5)                                                    |
| Depression                                       | 122 (11.5)                    | 703 (35.8)                     | 135 (34.4)               | 168 (15.1)                                                    | 792 (34.3)                                                    |
| Cardiovascular complications                     | 271 (25.4)                    | 734 (37.4)                     | 227 (57.9)               | 260 (23.4)                                                    | 972 (42.1)                                                    |
| Cardiomegaly                                     | 244 (22.9)                    | 559 (28.5)                     | 144 (36.7)               | 186 (16.8)                                                    | 761 (32.9)                                                    |
| Heart failure                                    | 18 (1.7)                      | 206 (10.5)                     | 131 (33.4)               | 53 (4.8)                                                      | 302 (13.1)                                                    |
| Pulmonary hypertension                           | 29 (2.7)                      | 277 (14.1)                     | 111 (28.3)               | 69 (6.2)                                                      | 348 (15.1)                                                    |
| Bone and joint problems <sup>c</sup>             | 130 (12.2)                    | 648 (33.0)                     | 168 (42.9)               | 165 (14.9)                                                    | 781 (33.8)                                                    |
| Avascular necrosis/osteonecrosis                 | 130 (12.2)                    | 637 (32.5)                     | 153 (39.0)               | 158 (14.2)                                                    | 762 (33.0)                                                    |
| Chronic pain                                     | 54 (5.1)                      | 700 (35.7)                     | 154 (39.3)               | 103 (9.3)                                                     | 805 (34.8)                                                    |
| Iron overload                                    | 97 (9.1)                      | 432 (22.0)                     | 106 (27.0)               | 111 (10.0)                                                    | 524 (22.7)                                                    |

|                                  |            |            |            |            |            |
|----------------------------------|------------|------------|------------|------------|------------|
| Hypercoagulable state            | 27 (2.5)   | 418 (21.3) | 136 (34.7) | 74 (6.7)   | 507 (21.9) |
| Gallbladder disease <sup>d</sup> | 188 (17.7) | 344 (17.5) | 41 (10.5)  | 122 (11.0) | 451 (19.5) |
| Gallstones                       | 176 (16.5) | 319 (16.3) | 36 (9.2)   | 114 (10.3) | 417 (18.1) |

*SCD* sickle cell disease; *VOC* vaso-occlusive crisis

<sup>a</sup>Data were assessed during the variable-length follow-up, beginning on the index date and ending on the earliest date of either inpatient death, end of continuous enrollment, or end of the study period (March 1, 2020)

<sup>b</sup>Clinical complications that occurred in >10% of the patient population are presented

<sup>c</sup>Bone/joint complications included avascular necrosis/osteonecrosis and osteoporosis

<sup>d</sup>Gallbladder disease included chronic cholecystitis, gallstones, and other chronic gallbladder disease

**Supplementary Table 2** Treatment patterns in patients with SCD with recurrent VOCs based on number of VOCs<sup>a</sup>

|                                               | <b>&lt;2 VOCs per year<br/>during follow-up<br/>(<i>n</i> = 1110)</b> | <b>≥2 VOCs per year<br/>during follow-up<br/>(<i>n</i> = 2310)</b> |
|-----------------------------------------------|-----------------------------------------------------------------------|--------------------------------------------------------------------|
| Treatment claims, <i>n</i> (%) <sup>b</sup>   |                                                                       |                                                                    |
| Pain medications                              | 1072 (96.6)                                                           | 2294 (99.3)                                                        |
| Opioids <sup>c</sup>                          | 973 (87.7)                                                            | 2227 (96.4)                                                        |
| NSAIDs                                        | 927 (83.5)                                                            | 2122 (91.9)                                                        |
| Gabapentin                                    | 98 (8.8)                                                              | 524 (22.7)                                                         |
| Folic acid                                    | 741 (66.8)                                                            | 1691 (73.2)                                                        |
| Hydroxyurea                                   | 647 (58.3)                                                            | 1678 (72.6)                                                        |
| Penicillin                                    | 319 (28.7)                                                            | 605 (26.2)                                                         |
| Iron chelation therapy                        | 86 (7.7)                                                              | 382 (16.5)                                                         |
| Treatment claims PPPY, mean (SD) <sup>b</sup> |                                                                       |                                                                    |
| Pain medications                              | 6.0 (8.0)                                                             | 16.4 (15.8)                                                        |
| Opioids <sup>c</sup>                          | 4.0 (7.0)                                                             | 12.5 (14.1)                                                        |
| NSAIDs                                        | 1.8 (2.0)                                                             | 3.6 (3.9)                                                          |
| Gabapentin                                    | 0.2 (1.3)                                                             | 0.4 (1.3)                                                          |
| Folic acid                                    | 2.8 (3.4)                                                             | 2.5 (3.0)                                                          |
| Hydroxyurea                                   | 2.8 (3.6)                                                             | 2.6 (3.0)                                                          |
| Penicillin                                    | 1.6 (4.4)                                                             | 0.9 (3.2)                                                          |

---

|                        |           |           |
|------------------------|-----------|-----------|
| Iron chelation therapy | 0.4 (2.2) | 0.7 (3.4) |
|------------------------|-----------|-----------|

---

*NSAID* non-steroidal anti-inflammatory drug, *PPPY* per-patient-per-year, *SCD* sickle cell disease, *SD* standard deviation, *VOC* vaso-occlusive crisis

<sup>a</sup>Data were assessed during the variable-length follow-up, beginning on the index date and ending on the earliest date of either inpatient death, end of continuous enrollment, or end of the study period (March 1, 2020)

<sup>b</sup>Data are presented for all patients with SCD with recurrent VOCs

<sup>c</sup>Opioids included buprenorphine, dihydrocodeine, fentanyl, hydromorphone, morphine, oxycodone, tramadol, and Tylenol with codeine

**Supplementary Table 3** Annual HCRU for patients with SCD with recurrent VOCs by payer type<sup>a</sup>

|                                                | Patients with SCD with recurrent VOCs |                                |
|------------------------------------------------|---------------------------------------|--------------------------------|
|                                                | Commercial<br>( <i>n</i> = 679)       | Medicaid<br>( <i>n</i> = 2737) |
| Inpatient                                      |                                       |                                |
| Patients with $\geq 1$ admission, <i>n</i> (%) | 631 (92.9)                            | 2577 (94.2)                    |
| Inpatient admissions PPPY, mean (SD)           | 2.4 (2.4)                             | 2.7 (3.0)                      |
| Outpatient visits PPPY, mean (SD)              |                                       |                                |
| All outpatient <sup>b</sup>                    | 50.6 (49.2)                           | 50.1 (47.8)                    |
| Emergency department <sup>c</sup>              | 4.0 (7.5)                             | 5.3 (8.2)                      |
| Physician office <sup>d</sup>                  | 11.1 (13.9)                           | 11.2 (9.2)                     |
| Laboratory <sup>e</sup>                        | 12.1 (12.2)                           | 9.1 (8.5)                      |
| Other <sup>f</sup>                             | 23.4 (30.6)                           | 24.5 (36.8)                    |
| Outpatient pharmacy                            |                                       |                                |
| Prescriptions PPPY, mean (SD)                  | 27.7 (22.6)                           | 36.9 (29.3)                    |

*HCRU* healthcare resource utilization, *PPPY* per-patient-per-year, *SCD* sickle cell disease, *SD* standard deviation, *VOC* vaso-occlusive crisis

<sup>a</sup>Data were assessed during the variable-length follow-up, beginning on the index date and ending on the earliest date of either inpatient death, end of continuous enrollment, or end of the study period (March 1, 2020)

<sup>b</sup>Outpatient visits were counted by identifying unique visits to a particular healthcare provider type on a particular date

<sup>c</sup>Emergency department visits were counted as the number of distinct dates with an emergency department claim

<sup>d</sup>Physician office visits were counted as the number of distinct dates with a visit to a unique healthcare provider type in an office setting

<sup>e</sup>Laboratory visits were counted as the number of distinct dates with a visit to a laboratory

<sup>f</sup>Other outpatient visits were counted as the number of distinct dates with a visit to a unique healthcare provider type in a non-office setting (e.g. radiology, outpatient surgery, etc.)
